# Supplementary material for: Alone Together: Is Strain Experienced Concurrently by Members of Operating Room Teams?: An Event-based Study
Source: PubMed Central journal article supplement — Ann Surg Open. 2023 Sep 12;4(3):e333. doi: 10.1097/AS9.0000000000000333 (PMC10513207; doi:10.1097/as9.0000000000000333), 2023-09-12
Supplement: as9-4-e333-s001.pdf [file as9-4-e333-s001.pdf]

**Supplemental Digital Content 1: differences in the frequency of experienced strain between professional groups, for each category of strain (dependent variable)**

**1) Differences in experienced task complexity across the different professional groups**

Tests of Between-Subjects Effects

| Source          | Type III Sum of Squares | df  | Mean Square | F      | Sig.  |
|-----------------|-------------------------|-----|-------------|--------|-------|
| Corrected Model | 19.78 <sup>a</sup>      | 5   | 3.96        | 10.06  | 0.000 |
| Intercept       | 68.59                   | 1   | 68.59       | 174.53 | 0.000 |
| prof_group      | 19.78                   | 5   | 3.96        | 10.06  | 0.000 |
| Error           | 255.44                  | 650 | 0.39        |        |       |
| Total           | 347.00                  | 656 |             |        |       |
| Corrected Total | 275.22                  | 655 |             |        |       |

a. R Squared = .072 (Adjusted R Squared = .065)

Multiple Comparisons

|            |             | Mean Difference (I-J) | Std. Error | Sig.  | 95% Confidence Interval |             |
|------------|-------------|-----------------------|------------|-------|-------------------------|-------------|
|            |             |                       |            |       | Lower Bound             | Upper Bound |
| surgeon    | resident    | 0.07                  | 0.08       | 1.000 | -0.18                   | 0.32        |
|            | student     | 0.25                  | 0.11       | 0.320 | -0.07                   | 0.56        |
|            | scrub tech  | 0.50                  | 0.08       | 0.000 | 0.26                    | 0.74        |
|            | circulator  | 0.35                  | 0.08       | 0.000 | 0.11                    | 0.58        |
| resident   | anesthetist | 0.26                  | 0.08       | 0.027 | 0.02                    | 0.51        |
|            | surgeon     | -0.07                 | 0.08       | 1.000 | -0.32                   | 0.18        |
|            | student     | 0.18                  | 0.11       | 1.000 | -0.14                   | 0.49        |
|            | scrub tech  | 0.43                  | 0.08       | 0.000 | 0.19                    | 0.67        |
| student    | circulator  | 0.28                  | 0.08       | 0.008 | 0.04                    | 0.51        |
|            | anesthetist | 0.19                  | 0.08       | 0.292 | -0.05                   | 0.43        |
|            | surgeon     | -0.25                 | 0.11       | 0.320 | -0.56                   | 0.07        |
|            | resident    | -0.18                 | 0.11       | 1.000 | -0.49                   | 0.14        |
| scrub tech | scrub tech  | 0.26                  | 0.10       | 0.213 | -0.05                   | 0.56        |
|            | circulator  | 0.10                  | 0.10       | 1.000 | -0.20                   | 0.40        |
|            | anesthetist | 0.02                  | 0.11       | 1.000 | -0.29                   | 0.33        |
|            | surgeon     | -0.50                 | 0.08       | 0.000 | -0.74                   | -0.26       |
| surgeon    | resident    | -0.43                 | 0.08       | 0.000 | -0.67                   | -0.19       |
|            | student     | -0.26                 | 0.10       | 0.213 | -0.56                   | 0.05        |

|             |             | Mean<br>Difference<br>(I-J) | Std.<br>Error | Sig.  | 95% Confidence<br>Interval |                |
|-------------|-------------|-----------------------------|---------------|-------|----------------------------|----------------|
|             |             |                             |               |       | Lower<br>Bound             | Upper<br>Bound |
|             | circulator  | -0.16                       | 0.08          | 0.661 | -0.38                      | 0.07           |
| circulator  | anesthetist | -0.24                       | 0.08          | 0.046 | -0.47                      | 0.00           |
|             | surgeon     | -0.35                       | 0.08          | 0.000 | -0.58                      | -0.11          |
|             | resident    | -0.28                       | 0.08          | 0.008 | -0.51                      | -0.04          |
|             | student     | -0.10                       | 0.10          | 1.000 | -0.40                      | 0.20           |
|             | scrub tech  | 0.16                        | 0.08          | 0.661 | -0.07                      | 0.38           |
| anesthetist | anesthetist | -0.08                       | 0.08          | 1.000 | -0.32                      | 0.15           |
|             | surgeon     | -0.26                       | 0.08          | 0.027 | -0.51                      | -0.02          |
|             | resident    | -0.19                       | 0.08          | 0.292 | -0.43                      | 0.05           |
|             | student     | -0.02                       | 0.11          | 1.000 | -0.33                      | 0.29           |
|             | scrub tech  | 0.24                        | 0.08          | 0.046 | 0.00                       | 0.47           |
|             | circulator  | 0.08                        | 0.08          | 1.000 | -0.15                      | 0.32           |

Based on observed means.

The error term is Mean Square(Error) = .393.

**2) Differences in experienced patient issues across the different professional groups**

Tests of Between-Subjects Effects

| Source          | Type III Sum of Squares | df  | Mean Square | F     | Sig.  |
|-----------------|-------------------------|-----|-------------|-------|-------|
| Corrected Model | 2.30 <sup>a</sup>       | 5   | 0.46        | 4.05  | 0.001 |
| Intercept       | 5.27                    | 1   | 5.27        | 46.35 | 0.000 |
| prof_group      | 2.30                    | 5   | 0.46        | 4.05  | 0.001 |
| Error           | 73.84                   | 650 | 0.11        |       |       |
| Total           | 82.00                   | 656 |             |       |       |
| Corrected Total | 76.14                   | 655 |             |       |       |

a. R Squared = .030 (Adjusted R Squared = .023)

Multiple Comparisons

|            |             | Mean Difference (I-J) | Std. Error | Sig.  | 95% Confidence Interval |             |
|------------|-------------|-----------------------|------------|-------|-------------------------|-------------|
|            |             |                       |            |       | Lower Bound             | Upper Bound |
| surgeon    | resident    | 0.00                  | 0.05       | 1.000 | -0.13                   | 0.14        |
|            | student     | 0.08                  | 0.06       | 1.000 | -0.09                   | 0.25        |
|            | scrub tech  | 0.12                  | 0.04       | 0.126 | -0.01                   | 0.25        |
|            | circulator  | 0.10                  | 0.04       | 0.261 | -0.02                   | 0.23        |
|            | anesthetist | -0.03                 | 0.05       | 1.000 | -0.16                   | 0.10        |
| resident   | surgeon     | 0.00                  | 0.05       | 1.000 | -0.14                   | 0.13        |
|            | student     | 0.08                  | 0.06       | 1.000 | -0.09                   | 0.25        |
|            | scrub tech  | 0.11                  | 0.04       | 0.124 | -0.01                   | 0.24        |
|            | circulator  | 0.10                  | 0.04       | 0.260 | -0.02                   | 0.23        |
|            | anesthetist | -0.03                 | 0.04       | 1.000 | -0.16                   | 0.10        |
| student    | surgeon     | -0.08                 | 0.06       | 1.000 | -0.25                   | 0.09        |
|            | resident    | -0.08                 | 0.06       | 1.000 | -0.25                   | 0.09        |
|            | scrub tech  | 0.04                  | 0.06       | 1.000 | -0.13                   | 0.20        |
|            | circulator  | 0.02                  | 0.06       | 1.000 | -0.14                   | 0.19        |
|            | anesthetist | -0.11                 | 0.06       | 0.718 | -0.28                   | 0.05        |
| scrub tech | surgeon     | -0.12                 | 0.04       | 0.126 | -0.25                   | 0.01        |
|            | resident    | -0.11                 | 0.04       | 0.124 | -0.24                   | 0.01        |
|            | student     | -0.04                 | 0.06       | 1.000 | -0.20                   | 0.13        |
|            | circulator  | -0.01                 | 0.04       | 1.000 | -0.14                   | 0.11        |
|            | anesthetist | -0.15                 | 0.04       | 0.010 | -0.27                   | -0.02       |
| circulator | surgeon     | -0.10                 | 0.04       | 0.261 | -0.23                   | 0.02        |
|            | resident    | -0.10                 | 0.04       | 0.260 | -0.23                   | 0.02        |
|            | student     | -0.02                 | 0.06       | 1.000 | -0.19                   | 0.14        |

|             |             | Mean<br>Difference<br>(I-J) | Std.<br>Error | Sig.  | 95% Confidence<br>Interval |                |
|-------------|-------------|-----------------------------|---------------|-------|----------------------------|----------------|
|             |             |                             |               |       | Lower<br>Bound             | Upper<br>Bound |
| anesthetist | scrub tech  | 0.01                        | 0.04          | 1.000 | -0.11                      | 0.14           |
|             | anesthetist | -0.13                       | 0.04          | 0.024 | -0.26                      | -0.01          |
|             | surgeon     | 0.03                        | 0.05          | 1.000 | -0.10                      | 0.16           |
|             | resident    | 0.03                        | 0.04          | 1.000 | -0.10                      | 0.16           |
|             | student     | 0.11                        | 0.06          | 0.718 | -0.05                      | 0.28           |
| circulator  | scrub tech  | 0.15                        | 0.04          | 0.010 | 0.02                       | 0.27           |
|             | circulator  | 0.13                        | 0.04          | 0.024 | 0.01                       | 0.26           |

Based on observed means.

The error term is Mean Square(Error) = .114.

### 3) Differences in experienced issues with material and resources across the different professional groups

Tests of Between-Subjects Effects

| Source          | Type III Sum of Squares | df  | Mean Square | F     | Sig.  |
|-----------------|-------------------------|-----|-------------|-------|-------|
| Corrected Model | 0.96 <sup>a</sup>       | 5   | 0.19        | 1.83  | 0.104 |
| Intercept       | 4.30                    | 1   | 4.30        | 41.19 | 0.000 |
| prof_group      | 0.96                    | 5   | 0.19        | 1.83  | 0.104 |
| Error           | 67.91                   | 650 | 0.10        |       |       |
| Total           | 74.00                   | 656 |             |       |       |
| Corrected Total | 68.87                   | 655 |             |       |       |

a. R Squared = .014 (Adjusted R Squared = .006)

#### Multiple Comparisons

|            |             | Mean Difference (I-J) | Std. Error | Sig.  | 95% Confidence Interval |             |
|------------|-------------|-----------------------|------------|-------|-------------------------|-------------|
|            |             |                       |            |       | Lower Bound             | Upper Bound |
| surgeon    | resident    | 0.10                  | 0.04       | 0.365 | -0.03                   | 0.23        |
|            | student     | 0.09                  | 0.06       | 1.000 | -0.07                   | 0.25        |
|            | scrub tech  | 0.06                  | 0.04       | 1.000 | -0.07                   | 0.18        |
|            | circulator  | 0.03                  | 0.04       | 1.000 | -0.09                   | 0.16        |
|            | anesthetist | 0.11                  | 0.04       | 0.206 | -0.02                   | 0.23        |
| resident   | surgeon     | -0.10                 | 0.04       | 0.365 | -0.23                   | 0.03        |
|            | student     | -0.01                 | 0.05       | 1.000 | -0.17                   | 0.15        |
|            | scrub tech  | -0.04                 | 0.04       | 1.000 | -0.16                   | 0.08        |
|            | circulator  | -0.07                 | 0.04       | 1.000 | -0.19                   | 0.06        |
|            | anesthetist | 0.01                  | 0.04       | 1.000 | -0.12                   | 0.13        |
| student    | surgeon     | -0.09                 | 0.06       | 1.000 | -0.25                   | 0.07        |
|            | resident    | 0.01                  | 0.05       | 1.000 | -0.15                   | 0.17        |
|            | scrub tech  | -0.03                 | 0.05       | 1.000 | -0.19                   | 0.12        |
|            | circulator  | -0.06                 | 0.05       | 1.000 | -0.21                   | 0.10        |
|            | anesthetist | 0.02                  | 0.05       | 1.000 | -0.14                   | 0.18        |
| scrub tech | surgeon     | -0.06                 | 0.04       | 1.000 | -0.18                   | 0.07        |
|            | resident    | 0.04                  | 0.04       | 1.000 | -0.08                   | 0.16        |
|            | student     | 0.03                  | 0.05       | 1.000 | -0.12                   | 0.19        |
|            | circulator  | -0.02                 | 0.04       | 1.000 | -0.14                   | 0.09        |
|            | anesthetist | 0.05                  | 0.04       | 1.000 | -0.07                   | 0.17        |
| circulator | surgeon     | -0.03                 | 0.04       | 1.000 | -0.16                   | 0.09        |
|            | resident    | 0.07                  | 0.04       | 1.000 | -0.06                   | 0.19        |
|            | student     | 0.06                  | 0.05       | 1.000 | -0.10                   | 0.21        |
|            | scrub tech  | 0.02                  | 0.04       | 1.000 | -0.09                   | 0.14        |

|             |             | Mean<br>Difference<br>(I-J) | Std.<br>Error | Sig.  | 95% Confidence<br>Interval |                |
|-------------|-------------|-----------------------------|---------------|-------|----------------------------|----------------|
|             |             |                             |               |       | Lower<br>Bound             | Upper<br>Bound |
|             | anesthetist | 0.07                        | 0.04          | 1.000 | -0.05                      | 0.19           |
| anesthetist | surgeon     | -0.11                       | 0.04          | 0.206 | -0.23                      | 0.02           |
|             | resident    | -0.01                       | 0.04          | 1.000 | -0.13                      | 0.12           |
|             | student     | -0.02                       | 0.05          | 1.000 | -0.18                      | 0.14           |
|             | scrub tech  | -0.05                       | 0.04          | 1.000 | -0.17                      | 0.07           |
|             | circulator  | -0.07                       | 0.04          | 1.000 | -0.19                      | 0.05           |

Based on observed means.

The error term is Mean Square(Error) = .104.

**4) Differences in reporting others' behaviors across the different professional groups**

Tests of Between-Subjects Effects

| Source          | Type III Sum of Squares | df  | Mean Square | F     | Sig.  |
|-----------------|-------------------------|-----|-------------|-------|-------|
| Corrected Model | 0.67a                   | 5   | 0.13        | 1.32  | 0.255 |
| Intercept       | 4.29                    | 1   | 4.29        | 41.91 | 0.000 |
| prof_group      | 0.67                    | 5   | 0.13        | 1.32  | 0.255 |
| Error           | 66.55                   | 650 | 0.10        |       |       |
| Total           | 72.00                   | 656 |             |       |       |
| Corrected Total | 67.22                   | 655 |             |       |       |

a. R Squared = .010 (Adjusted R Squared = .002)

Multiple Comparisons

|            |             | Mean Difference (I-J) | Std. Error | Sig.  | 95% Confidence Interval |             |
|------------|-------------|-----------------------|------------|-------|-------------------------|-------------|
|            |             |                       |            |       | Lower Bound             | Upper Bound |
| surgeon    | resident    | 0.06                  | 0.04       | 1.000 | -0.07                   | 0.19        |
|            | student     | 0.00                  | 0.05       | 1.000 | -0.16                   | 0.17        |
|            | scrub tech  | 0.02                  | 0.04       | 1.000 | -0.11                   | 0.14        |
|            | circulator  | -0.03                 | 0.04       | 1.000 | -0.15                   | 0.09        |
|            | anesthetist | 0.05                  | 0.04       | 1.000 | -0.07                   | 0.18        |
| resident   | surgeon     | -0.06                 | 0.04       | 1.000 | -0.19                   | 0.07        |
|            | student     | -0.05                 | 0.05       | 1.000 | -0.21                   | 0.10        |
|            | scrub tech  | -0.04                 | 0.04       | 1.000 | -0.16                   | 0.08        |
|            | circulator  | -0.09                 | 0.04       | 0.437 | -0.21                   | 0.03        |
|            | anesthetist | -0.01                 | 0.04       | 1.000 | -0.13                   | 0.12        |
| student    | surgeon     | 0.00                  | 0.05       | 1.000 | -0.17                   | 0.16        |
|            | resident    | 0.05                  | 0.05       | 1.000 | -0.10                   | 0.21        |
|            | scrub tech  | 0.01                  | 0.05       | 1.000 | -0.14                   | 0.17        |
|            | circulator  | -0.03                 | 0.05       | 1.000 | -0.19                   | 0.12        |
|            | anesthetist | 0.05                  | 0.05       | 1.000 | -0.11                   | 0.20        |
| scrub tech | surgeon     | -0.02                 | 0.04       | 1.000 | -0.14                   | 0.11        |
|            | resident    | 0.04                  | 0.04       | 1.000 | -0.08                   | 0.16        |
|            | student     | -0.01                 | 0.05       | 1.000 | -0.17                   | 0.14        |
|            | circulator  | -0.05                 | 0.04       | 1.000 | -0.16                   | 0.07        |
|            | anesthetist | 0.03                  | 0.04       | 1.000 | -0.09                   | 0.16        |
| circulator | surgeon     | 0.03                  | 0.04       | 1.000 | -0.09                   | 0.15        |
|            | resident    | 0.09                  | 0.04       | 0.437 | -0.03                   | 0.21        |
|            | student     | 0.03                  | 0.05       | 1.000 | -0.12                   | 0.19        |
|            | scrub tech  | 0.05                  | 0.04       | 1.000 | -0.07                   | 0.16        |

|             |            | Mean<br>Difference<br>(I-J) | Std.<br>Error | Sig.  | 95% Confidence<br>Interval |                |
|-------------|------------|-----------------------------|---------------|-------|----------------------------|----------------|
|             |            |                             |               |       | Lower<br>Bound             | Upper<br>Bound |
| anesthetist | surgeon    | -0.05                       | 0.04          | 1.000 | -0.18                      | 0.07           |
|             | resident   | 0.01                        | 0.04          | 1.000 | -0.12                      | 0.13           |
|             | student    | -0.05                       | 0.05          | 1.000 | -0.20                      | 0.11           |
|             | scrub tech | -0.03                       | 0.04          | 1.000 | -0.16                      | 0.09           |
|             | circulator | -0.08                       | 0.04          | 0.707 | -0.20                      | 0.04           |

Based on observed means.

The error term is Mean Square(Error) = .102.



**5) Differences in experienced issues with knowledge, skills or own performance across the different professional groups.**

Tests of Between-Subjects Effects

| Source          | Type III Sum of Squares | df  | Mean Square | F     | Sig.  |
|-----------------|-------------------------|-----|-------------|-------|-------|
| Corrected Model | 1.89 <sup>a</sup>       | 5   | 0.38        | 3.11  | 0.009 |
| Intercept       | 7.15                    | 1   | 7.15        | 58.80 | 0.000 |
| prof_group      | 1.89                    | 5   | 0.38        | 3.11  | 0.009 |
| Error           | 79.06                   | 650 | 0.12        |       |       |
| Total           | 87.00                   | 656 |             |       |       |
| Corrected Total | 80.95                   | 655 |             |       |       |

a. R Squared = .023 (Adjusted R Squared = .016)

Multiple Comparisons

|            |             | Mean Difference (I-J) | Std. Error | Sig.  | 95% Confidence Interval |             |
|------------|-------------|-----------------------|------------|-------|-------------------------|-------------|
|            |             |                       |            |       | Lower Bound             | Upper Bound |
| surgeon    | resident    | 0.03                  | 0.05       | 1.000 | -0.11                   | 0.17        |
|            | student     | -0.08                 | 0.06       | 1.000 | -0.25                   | 0.10        |
|            | scrub tech  | 0.05                  | 0.05       | 1.000 | -0.09                   | 0.18        |
|            | circulator  | 0.13                  | 0.04       | 0.081 | -0.01                   | 0.26        |
|            | anesthetist | 0.05                  | 0.05       | 1.000 | -0.08                   | 0.19        |
| resident   | surgeon     | -0.03                 | 0.05       | 1.000 | -0.17                   | 0.11        |
|            | student     | -0.10                 | 0.06       | 1.000 | -0.28                   | 0.07        |
|            | scrub tech  | 0.02                  | 0.04       | 1.000 | -0.11                   | 0.15        |
|            | circulator  | 0.10                  | 0.04       | 0.407 | -0.03                   | 0.23        |
|            | anesthetist | 0.03                  | 0.05       | 1.000 | -0.11                   | 0.16        |
| student    | surgeon     | 0.08                  | 0.06       | 1.000 | -0.10                   | 0.25        |
|            | resident    | 0.10                  | 0.06       | 1.000 | -0.07                   | 0.28        |
|            | scrub tech  | 0.12                  | 0.06       | 0.527 | -0.05                   | 0.29        |
|            | circulator  | 0.20                  | 0.06       | 0.007 | 0.03                    | 0.37        |
|            | anesthetist | 0.13                  | 0.06       | 0.396 | -0.04                   | 0.30        |
| scrub tech | surgeon     | -0.05                 | 0.05       | 1.000 | -0.18                   | 0.09        |
|            | resident    | -0.02                 | 0.04       | 1.000 | -0.15                   | 0.11        |
|            | student     | -0.12                 | 0.06       | 0.527 | -0.29                   | 0.05        |
|            | circulator  | 0.08                  | 0.04       | 0.980 | -0.05                   | 0.21        |
|            | anesthetist | 0.01                  | 0.04       | 1.000 | -0.12                   | 0.14        |
| circulator | surgeon     | -0.13                 | 0.04       | 0.081 | -0.26                   | 0.01        |
|            | resident    | -0.10                 | 0.04       | 0.407 | -0.23                   | 0.03        |
|            | student     | -0.20                 | 0.06       | 0.007 | -0.37                   | -0.03       |

|             |             | Mean<br>Difference<br>(I-J) | Std.<br>Error | Sig.  | 95% Confidence<br>Interval |                |
|-------------|-------------|-----------------------------|---------------|-------|----------------------------|----------------|
|             |             |                             |               |       | Lower<br>Bound             | Upper<br>Bound |
| anesthetist | anesthetist | -0.07                       | 0.04          | 1.000 | -0.20                      | 0.06           |
|             | surgeon     | -0.05                       | 0.05          | 1.000 | -0.19                      | 0.08           |
|             | resident    | -0.03                       | 0.05          | 1.000 | -0.16                      | 0.11           |
|             | student     | -0.13                       | 0.06          | 0.396 | -0.30                      | 0.04           |
|             | scrub tech  | -0.01                       | 0.04          | 1.000 | -0.14                      | 0.12           |
|             | circulator  | 0.07                        | 0.04          | 1.000 | -0.06                      | 0.20           |

Based on observed means.

The error term is Mean Square(Error) = .122.

**6) Differences in observation of others' strain across the different professional groups.**

Tests of Between-Subjects Effects

| Source          | Type III Sum of Squares | df  | Mean Square | F     | Sig.  |
|-----------------|-------------------------|-----|-------------|-------|-------|
| Corrected Model | 0.42 <sup>a</sup>       | 5   | 0.08        | 3.57  | 0.003 |
| Intercept       | 0.47                    | 1   | 0.47        | 20.10 | 0.000 |
| prof_group      | 0.42                    | 5   | 0.08        | 3.57  | 0.003 |
| Error           | 15.28                   | 650 | 0.02        |       |       |
| Total           | 16.00                   | 656 |             |       |       |
| Corrected Total | 15.70                   | 655 |             |       |       |

a. R Squared = .027 (Adjusted R Squared = .019)

Multiple Comparisons

|            |             | Mean Difference (I-J) | Std. Error | Sig.  | 95% Confidence Interval |             |
|------------|-------------|-----------------------|------------|-------|-------------------------|-------------|
|            |             |                       |            |       | Lower Bound             | Upper Bound |
| surgeon    | resident    | -0.02                 | 0.02       | 1.000 | -0.08                   | 0.04        |
|            | student     | -0.10                 | 0.03       | 0.003 | -0.17                   | -0.02       |
|            | scrub tech  | 0.00                  | 0.02       | 1.000 | -0.06                   | 0.06        |
|            | circulator  | -0.03                 | 0.02       | 1.000 | -0.09                   | 0.03        |
|            | anesthetist | -0.03                 | 0.02       | 1.000 | -0.09                   | 0.03        |
| resident   | surgeon     | 0.02                  | 0.02       | 1.000 | -0.04                   | 0.08        |
|            | student     | -0.08                 | 0.03       | 0.027 | -0.16                   | 0.00        |
|            | scrub tech  | 0.02                  | 0.02       | 1.000 | -0.04                   | 0.08        |
|            | circulator  | -0.01                 | 0.02       | 1.000 | -0.07                   | 0.05        |
|            | anesthetist | -0.01                 | 0.02       | 1.000 | -0.07                   | 0.05        |
| student    | surgeon     | 0.10                  | 0.03       | 0.003 | 0.02                    | 0.17        |
|            | resident    | 0.08                  | 0.03       | 0.027 | 0.00                    | 0.16        |
|            | scrub tech  | 0.10                  | 0.03       | 0.002 | 0.02                    | 0.17        |
|            | circulator  | 0.07                  | 0.03       | 0.096 | -0.01                   | 0.14        |
|            | anesthetist | 0.07                  | 0.03       | 0.076 | 0.00                    | 0.15        |
| scrub tech | surgeon     | 0.00                  | 0.02       | 1.000 | -0.06                   | 0.06        |
|            | resident    | -0.02                 | 0.02       | 1.000 | -0.08                   | 0.04        |
|            | student     | -0.10                 | 0.03       | 0.002 | -0.17                   | -0.02       |
|            | circulator  | -0.03                 | 0.02       | 1.000 | -0.08                   | 0.03        |
|            | anesthetist | -0.03                 | 0.02       | 1.000 | -0.08                   | 0.03        |
| circulator | surgeon     | 0.03                  | 0.02       | 1.000 | -0.03                   | 0.09        |
|            | resident    | 0.01                  | 0.02       | 1.000 | -0.05                   | 0.07        |
|            | student     | -0.07                 | 0.03       | 0.096 | -0.14                   | 0.01        |
|            | scrub tech  | 0.03                  | 0.02       | 1.000 | -0.03                   | 0.08        |

|             |            | Mean<br>Difference<br>(I-J) | Std.<br>Error | Sig.  | 95% Confidence<br>Interval |                |
|-------------|------------|-----------------------------|---------------|-------|----------------------------|----------------|
|             |            |                             |               |       | Lower<br>Bound             | Upper<br>Bound |
| anesthetist | surgeon    | 0.03                        | 0.02          | 1.000 | -0.03                      | 0.09           |
|             | resident   | 0.01                        | 0.02          | 1.000 | -0.05                      | 0.07           |
|             | student    | -0.07                       | 0.03          | 0.076 | -0.15                      | 0.00           |
|             | scrub tech | 0.03                        | 0.02          | 1.000 | -0.03                      | 0.08           |
|             | circulator | 0.00                        | 0.02          | 1.000 | -0.06                      | 0.05           |

Based on observed means.

The error term is Mean Square(Error) = .024.
